# Supplementary material
Source: PubMed Central journal article supplement (PMC3030374)
Supplement: supp_M110.186643_jbc.M110.186643-1.pdf [file supp_M110.186643_jbc.M110.186643-1.pdf]

## Synthesis of VE Analogs

### 1. Synthesis of *rac*-MitoVE<sub>11</sub>S (**2**)

The synthetic route used MitoVE<sub>11</sub> as a precursor (VJAJ and RAJS, manuscript in preparation) as shown below.

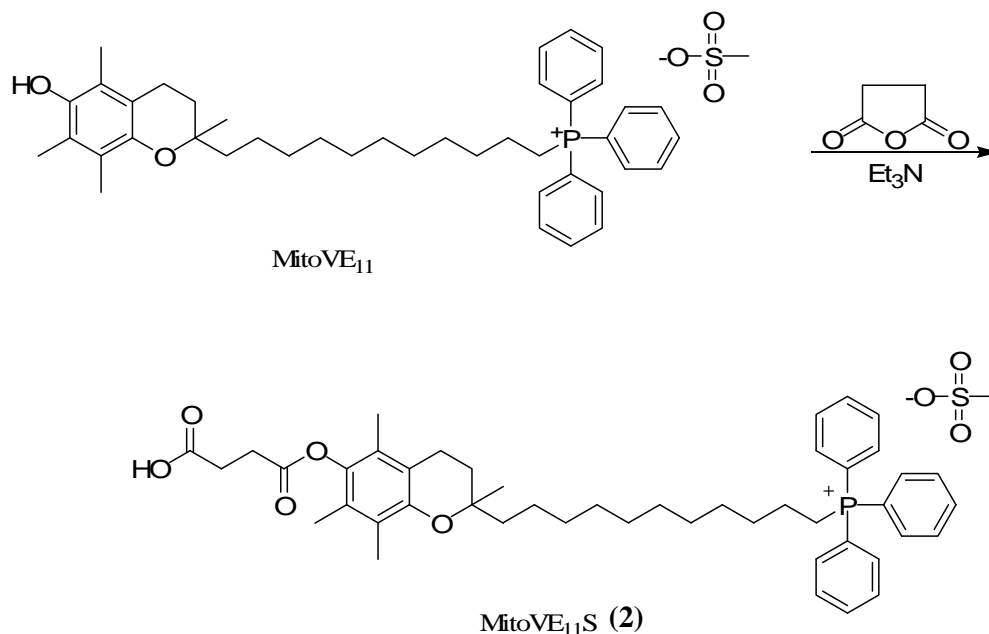

*{11-[6-(3-Carboxy-propionyloxy)-2,5,7,8-tetramethyl-chroman-2-yl]-undecyl}triphenyl-phosphonium methanesulfonate (MitoVE<sub>11</sub>S) (**2**)*

A solution of { 11-[6-(3-carboxy-propionyloxy)-  
2,5,7,8-tetramethyl-chroman-2-yl]-  
undecyl}triphenylphosphonium

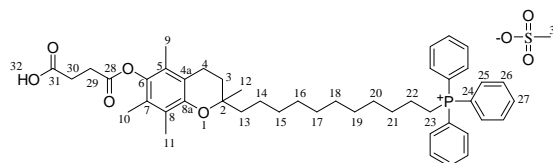

methanesulfonate<sup>1</sup> (30.3 mg, 42.3  $\mu$ mol) and succinic anhydride (6.35 mg, 63.5  $\mu$ mol) and Et<sub>3</sub>N (18  $\mu$ l, 127  $\mu$ mol) in CH<sub>2</sub>Cl<sub>2</sub> (0.20 ml) was stirred at room temperature overnight. The reaction was diluted with CH<sub>2</sub>Cl<sub>2</sub> (5 ml) and this was washed with aqueous methane sulfonic acid (10%, 3  $\times$  5 ml), dried over MgSO<sub>4</sub>, filtered and concentrated to give an orange oil. The crude product was purified by column chromatography on silica gel. Elution with EtOH:CH<sub>2</sub>Cl<sub>2</sub> (1:39) gave **3** as a pale yellow oil which, after freeze drying, was a pale yellow solid (20.6 mg, 25.2  $\mu$ mol, 60%). MS (+ve ESI) m/z calcd. for C<sub>46</sub>H<sub>58</sub>O<sub>5</sub>P<sup>+</sup>: 721.4016, found: 721.3987; <sup>1</sup>H NMR (500 MHz, CDCl<sub>3</sub>)  $\delta$  (ppm) 1.09 – 1.30 (12H, m, **H15** – **H20**) 1.22 (3H, s, **H12**), 1.35 (2H, quin, *J*=7.3 Hz, **H14**), 1.40 – 1.64

(6H, m, **H13**, **H21**, **H22**), 1.68 – 1.84 (2H, m, **H3**), 1.93 (3H, s, **H9**), 1.95 (3H, s, **H10**), 2.03 (3H, s, **H11**), 2.54 (2H, t,  $J=6.5$  Hz, **H4**), 2.74 (3H, s, **H33**), 2.77 (3H, s, **H29**), 2.84 (3H, s, **H30**), 3.43 (2H, m, **H23**), 7.66 – 7.72 (6H, m, **H26**), 7.74 – 7.82 (12H, m, **H25**, **H27**);  $^{13}\text{C}$  NMR (125 MHz,  $\text{CDCl}_3$ ):  $\delta$  (ppm) 11.86 (1C, s, **C11**) 12.12 (1C, s, **C9**), 12.99 (1C, s, **C10**), 20.64 (1C, s, **C4**), 21.99 (1C, d,  $J=50.0$  Hz, **C23**), 22.59 (1C, s (br), **C22**), 23.29 (1C, s, **C14**) 24.53 (1C, s, **C12**), 29.16, 29.30, 29.44, 29.73 (8C,  $4 \times$  s (br), **C15** – **C20**), 30.37 (1C, d,  $J=15.6$  Hz, **C21**), 31.28 (1C, s, **C3**), 38.50 (1C, s, **C13**), 39.49 (1C, s, **H29**), 75.02 (1C, s, **C2**), 117.40 (1C, s, **C4a**), 118.46 (1C, d,  $J=85.3$  Hz, **C21**), 122.81 (1C, s, **C7**), 125.15 (1C, s, **C5**), 126.84 (1C, s, **C8**), 140.62 (1C, s, **C6**), 149.30 (1C, s, **C8a**), 130.56 (1C, d,  $J=12.25$  Hz, **C26**), 133.60 (1C, d,  $J=9.9$  Hz, **C25**), 135.07 (1C, d,  $J=2.9$  Hz, **C27**), 171.22 (1C, s, **C28**), 174.32 (1C, s, **C31**)  $^{31}\text{P}$  NMR (121 MHz,  $\text{CDCl}_3$ )  $\delta$  (ppm) 25.5.

## 2. Preparation of short-chain homologs of *rac*-MitoVE<sub>11</sub>S

The detailed protocol for preparation of these compounds will be published elsewhere.

{5-[6-(3-carboxypropionyloxy)-2,5,7,8-tetramethylchroman-2-yl]-pentyl}triphenylphosphonium iodide (*MitoVE<sub>5</sub>S*) (**5**)

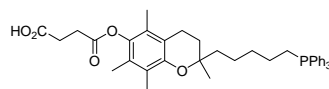

Oil. Yield : 76%. MS (+ve ESI)  $m/z$  calcd. for  $\text{C}_{40}\text{H}_{46}\text{O}_5\text{P}^+$ : 637.3077, found: 637.3068;  $^1\text{H}$  NMR (500 MHz,  $\text{CDCl}_3$ )  $\delta$  7.83-7.71 (m, 9H), 7.71-7.61 (m, 6H), 3.61-3.45 (m, 2H), 2.88-2.58 (m, 4H), 2.58-2.44 (m, 2H), 1.96 (s, 3H), 1.92 (s, 3H), 1.89 (s, 3H), 1.74-1.32 (m, 10H), 1.15 (s, 3H).  $^{13}\text{C}$  NMR (125 MHz,  $\text{CDCl}_3$ )  $\delta$  171.6, 171.2, 149.4, 140.9, 135.5, 133.9, 130.8, 127.1, 125.4, 122.9, 118.7, 118.0, 117.6, 75.0, 31.4, 31.0, 30.9, 29.7, 29.5, 29.2, 24.3, 23.2, 22.7, 20.8, 13.2, 12.3, 12.1.

{7-[6-(3-carboxypropionyloxy)-2,5,7,8-tetramethylchroman-2-yl]-heptyl}triphenylphosphonium iodide (*MitoVE<sub>7</sub>S*) (**4**)

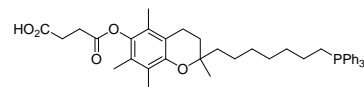

Oil. Yield : 64%. MS (+ve ESI)  $m/z$  calcd. for  $\text{C}_{42}\text{H}_{50}\text{O}_5\text{P}^+$ : 665.3390, found: 665.3377;  $^1\text{H}$  NMR (500 MHz,  $\text{CDCl}_3$ )  $\delta$  7.81-7.72 (m, 9H), 7.71-7.65 (m, 6H), 3.60-3.44 (m, 2H), 2.96-2.85 (m, 4H), 2.54-2.48 (m, 2H), 2.00 (s, 3H), 1.94 (s, 3H), 1.91 (s, 3H), 1.78-1.65 (m, 2H), 1.63-1.52 (m, 4H),

1.52-1.36 (m, 2H), 1.36-1.22 (m, 6H), 1.17 (s, 3H).  $^{13}\text{C}$  NMR (125 MHz,  $\text{CDCl}_3$ )  $\delta$  175.7, 171.4, 149.6, 140.8, 135.5, 133.9, 130.9, 127.0, 125.4, 123.1, 118.8, 118.1, 117.7, 75.3, 39.5, 31.4, 30.6, 29.8, 29.6, 29.2, 24.4, 23.7, 23.4, 23.0, 22.8, 20.9, 13.2, 12.4, 12.1.

{9-[6-(3-carboxypropionyloxy)-2,5,7,8-tetramethylchroman-2-yl]-nonyl}triphenylphosphonium iodide (MitoVE<sub>9</sub>S) (**3**)

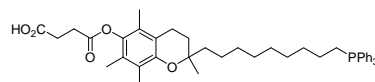

Oil. Yield : 60%. MS (+ve ESI) m/z calcd. for  $\text{C}_{44}\text{H}_{54}\text{O}_5\text{P}^+$ : 693.3703, found: 693.3675;  $^1\text{H}$  NMR (500 MHz, MeOD)  $\delta$  7.89-7.70 (m, 15H), 3.46-3.39 (m, 2H), 2.87 (t, 2H,  $J=7$  Hz), 2.67 (t, 2H,  $J=6.5$  Hz), 2.58 (t, 2H,  $J=6.5$  Hz), 2.03 (s, 3H), 1.96 (s, 3H), 1.94 (s, 3H), 1.82-1.70 (m, 2H), 1.70-1.60 (m, 2H), 1.60-1.45 (m, 4H), 1.45-1.36 (m, 2H), 1.34-1.22 (m, 8H), 1.20 (s, 3H).  $^{13}\text{C}$  NMR (125 MHz, MeOD)  $\delta$  176.1, 173.2, 150.4, 142.0, 136.2, 134.8, 131.5, 127.9, 126.3, 123.6, 120.2, 119.5, 118.7, 76.1, 40.2, 32.4, 31.5, 31.4, 31.0, 30.3, 30.1, 29.8, 24.5, 24.2, 23.5, 23.0, 22.6, 21.5, 13.2, 12.3, 12.1.

### 3. Preparation of MitoVE<sub>11</sub>S enantiomers

The two individual enantiomers *S*-MitoVE<sub>11</sub>S (**6**) and *R*-MitoVE<sub>11</sub>S (**7**) were prepared in a similar manner to *rac*-MitoVE<sub>11</sub>S (**3**), starting from (*R*)-(+)-6-hydroxy-2,5,7,8-tetramethylchroman-2-carboxylic acid and (*S*)-(-)-6-hydroxy-2,5,7,8-tetramethylchroman-2-carboxylic acid, respectively. These two non-racemic precursors were purchased from MP Biomedicals and Aldrich, respectively. Note that we obtained the (*S*)-MitoVE<sub>11</sub>S from the (*R*)-chroman, and we obtained the (*R*)-MitoVE<sub>11</sub>S from the (*S*)-chroman, the reason for this being that the Cahn-Ingold-Prelego priority of the groups changes when the long chain is attached to the chroman precursor. Full details of the synthesis will be published elsewhere.
